# Supplementary material for: Design of Pectin-Based Hydrogel Microspheres for Targeted Pulmonary Delivery
Source: MDPI journal article supplement (doi:10.3390/gels9090707), 2023-09-01
Supplement: s1 [file s1]

## Supplementary Materials

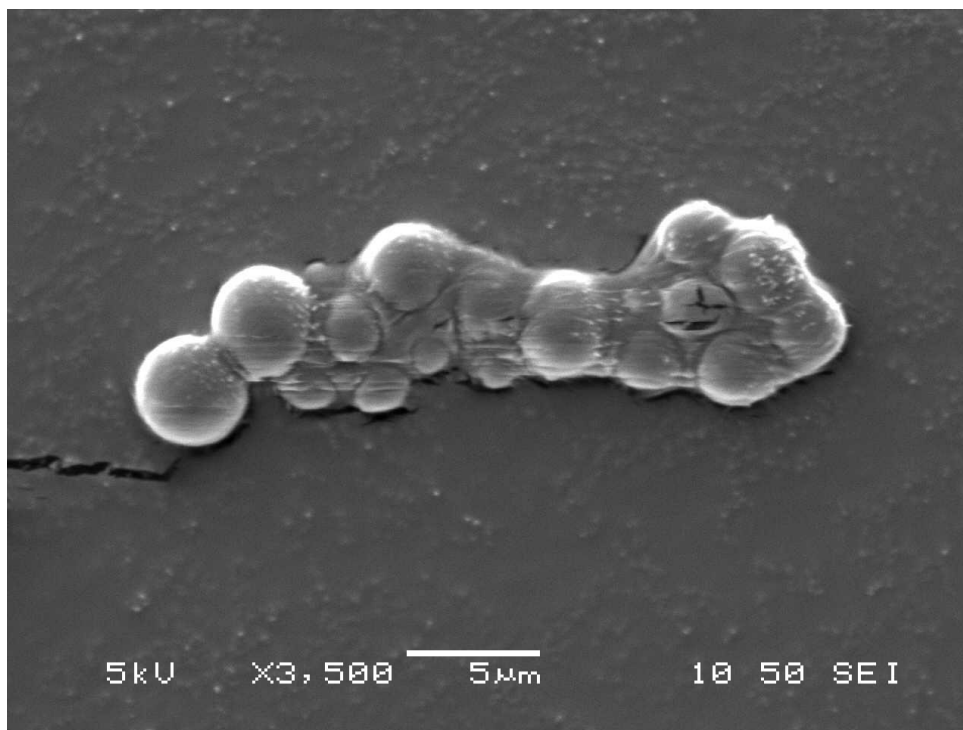

Figure S1: SEM image of aggregated uncoated microspheres (PM). The scale bar represents 5  $\mu\text{m}$ .

Movie S1: Responsiveness of PGM in Gamble's solution.

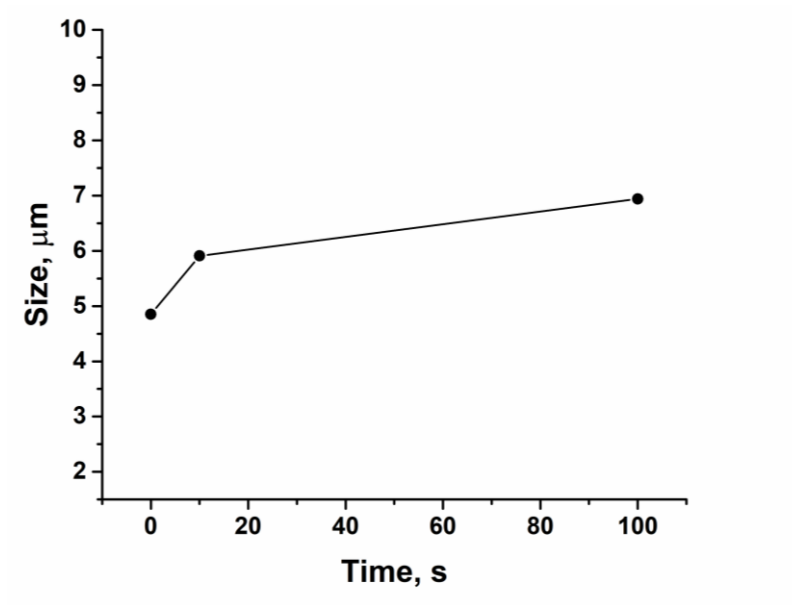

Figure S2: Size changes of PGM in Gamble's solution.
